# Supplementary material
Source: Springer Nature journal article supplement (https://www.springermedizin.de/resource/supplementary/12985_2010_982_MOESM5_ESM.pdf/9608878)

**A**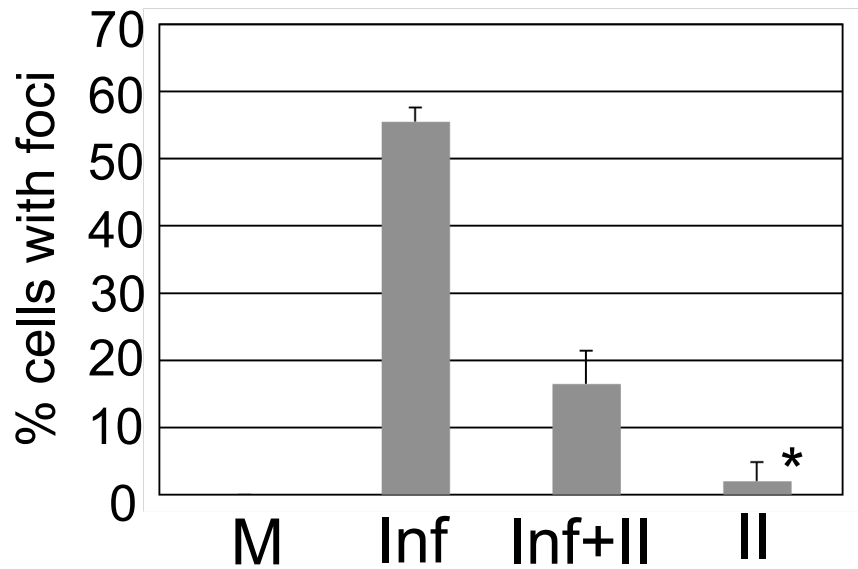**B**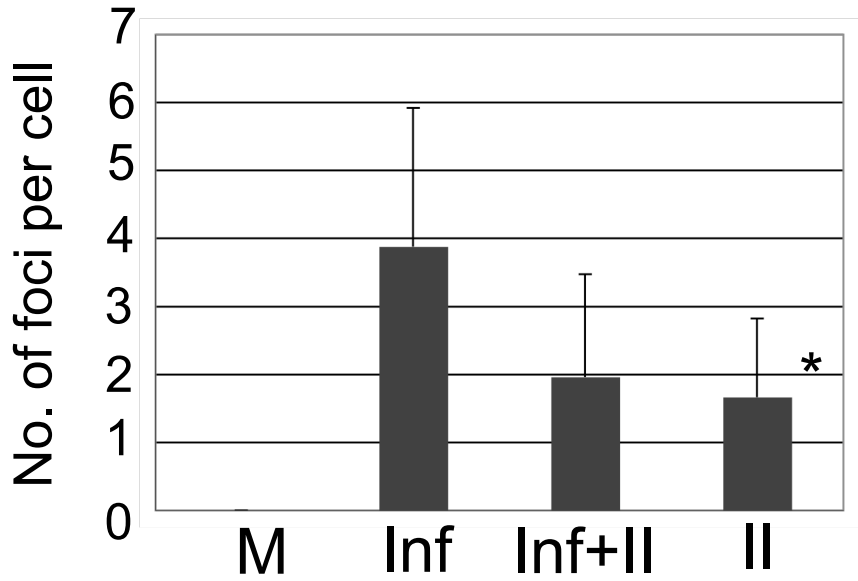

Supplement: MOESM5 [file 9608878]
